# Supplementary material for: Recurrent computations for visual pattern completion
Source: PubMed Central journal article supplement — Proc Natl Acad Sci U S A. 2018 Aug 13;115(35):8835–40. doi: 10.1073/pnas.1719397115 (PMC6126774; doi:10.1073/pnas.1719397115), 2018-08-13
Supplement: pnas.1719397115.sapp.pdf [file pnas.1719397115.sapp.pdf]

1001 **Recurrent computations for visual pattern completion**

1002 **Supporting Information Appendix**

1003

1004 Hanlin Tang<sup>1,4\*</sup>, Martin Schrimpf<sup>2,4\*</sup>, William Lotter<sup>1,3,4\*</sup>, Charlotte Moerman<sup>4</sup>, Ana  
1005 Paredes<sup>4</sup>, Josue Ortega Caro<sup>4</sup>, Walter Hardesty<sup>4</sup>, David Cox<sup>3</sup>, Gabriel Kreiman<sup>4</sup>

1006

1007 1. [Supplementary Materials and Methods](#)

1008 2. [Supplementary Discussion](#)

1009 3. [Supplementary Figures Legends](#)

1010 4. [Author contributions](#)

1011 5. [Data availability](#)

1012 6. [References](#)

1013

1014 **1. Supplementary Materials and Methods**

1015 **Psychophysics experiments**

1016 A total of 106 volunteers (62 female, ages 18-34 y) with normal or corrected to  
1017 normal vision participated in the psychophysics experiments reported in this study.

1018 All subjects gave informed consent and the studies were approved by the

1019 Institutional Review Board at Children's Hospital, Harvard Medical School. In 67

1020 subjects, eye positions were recorded during the experiments using an infrared

1021 camera eye tracker at 500 Hz (Eyelink D1000, SR Research, Ontario, Canada). We

1022 performed a main experiment (reported in **Figure 1F-G**) and three variations

1023 (reported in **Figures 1I-J, 2, S1 and S8-9**).

1024

1025 *Backward masking.* Multiple lines of evidence from behavioral (e.g. (1, 2)),

1026 physiological (e.g. (3-6)), and computational studies (e.g. (7-11)) suggest that

1027 recognition of whole isolated objects can be approximately described by rapid,

1028 largely feed-forward, mechanisms. Despite the success of these feed-forward

1029 architectures in describing the initial steps in visual recognition, each layer has

1030 limited spatial integration of its inputs. Additionally, feed-forward algorithms lack

1031 mechanisms to integrate temporal information or to take advantage of the rich  
1032 temporal dynamics characteristic of neural circuits that allow comparing signals  
1033 within and across different levels of the visual hierarchy. It has been suggested that  
1034 backward masking can interrupt recurrent and top-down signals: when an image is  
1035 rapidly followed by a spatially overlapping mask: the new high-contrast mask  
1036 stimulus interrupts any additional, presumably recurrent, processing of the original  
1037 image (3, 12-20). Thus, the psychophysical experiments tested recognition under  
1038 both unmasked and backward masked conditions.

1039

1040 *Main experiment.* Both spatial and temporal integration are likely to play an  
1041 important role in pattern completion mechanisms (21-27). A scheme of the  
1042 experiment designed to study the spatial and temporal integration during  
1043 recognition of occluded or partially visible objects is shown in **Figure 1**. Twenty-one  
1044 subjects were asked to categorize images into one of 5 possible semantic groups (5-  
1045 alternative forced choice) by pressing buttons on a gamepad. Stimuli consisted of  
1046 contrast-normalized gray scale images of 325 objects belonging to five categories  
1047 (animals, chairs, human faces, fruits, and vehicles). Each object was only presented  
1048 once in each condition. Each trial was initiated by fixating on a cross for at least 500  
1049 ms. After fixation, subjects were presented with the image of an object for a variable  
1050 time (25 ms, 50 ms, 75 ms, 100 ms, or 150 ms), referred to as the stimulus onset  
1051 asynchrony (SOA). The image was followed by either a noise mask (**Figure 1B**) or a  
1052 gray screen (**Figure 1A**), with a duration of 500 ms, after which a choice screen  
1053 appeared requiring the subject to respond. We use the term “pattern completion” to  
1054 indicate successful categorization of partial images in the 5-alternative forced choice  
1055 task used here and we do not mean to imply that subjects are forming any mental  
1056 image of the entire object, which we did not test. The noise mask was generated by  
1057 scrambling the phase of the images, while retaining the spectral coefficients. The  
1058 images (256 x 256 pixels) subtended approximately 5 degrees of the visual field. In  
1059 approximately 15% of the trials, the objects were presented in unaltered fashion  
1060 (the ‘Whole’ condition, **Figure 1C** left). In the other 85% of the trials, the objects  
1061 were rendered partially visible by presenting visual features through Gaussian

1062 bubbles (28) (the ‘Partial condition’, standard deviation = 14 pixels, **Figure 1C**  
1063 right). Each subject performed an initial training session to familiarize themselves  
1064 with the task and the stimuli. They were presented with 40 trials of whole objects,  
1065 then 80 calibration trials of occluded objects. During the calibration trials, the  
1066 number of bubbles was titrated using a staircase procedure to achieve an overall  
1067 task difficulty of 80% correct rate. The number of bubbles (but not their positions)  
1068 was then kept constant for the rest of the experiment. Results from the  
1069 familiarization and calibration phase were not included in the analyses. Despite  
1070 calibrating the number of bubbles, there was a wide range of degrees of occlusion  
1071 because the positions of the bubbles were randomized in every trial. Each image  
1072 was only presented once in the masked condition and once in the unmasked  
1073 condition.

1074

1075 *Physiology-based psychophysics experiment.* In the physiology-based psychophysics  
1076 experiment (**Figure 2**, n = 33 subjects), stimuli consisted of 650 images from five  
1077 categories for which we had previously recorded neural responses (see below). In  
1078 the neurophysiological recordings (25), bubble positions were randomly selected in  
1079 each subject and therefore each subject was presented with different images (except  
1080 for the fully visible ones). The main difference between the physiology-based  
1081 psychophysics experiment and the Main experiment is that here we used the exact  
1082 same images that were used in the physiological recordings (see description under  
1083 “Neurophysiological Recordings” below).

1084

1085 *Occlusion experiment.* In the occlusion experiment (**Figure 1I**, **Figure S1**, n=14  
1086 subjects in the partial objects experiment and n =15 subjects in the occlusion  
1087 experiment), we generated occluded images that revealed the same sets of features  
1088 as the partial objects, but contained an explicit occluder (**Figure 1D**) to activate  
1089 amodal completion cues. The stimulus set consisted of 16 objects from 4 different  
1090 categories. For comparison, we also collected performance with partial objects from  
1091 this reduced stimulus set.

1092

1093 *Novel objects experiment.* The main set of experiments required categorization of  
1094 images containing pictures of animals, chairs, faces, fruits and vehicles. None of the  
1095 subjects involved in the psychophysics or neurophysiological measurements had  
1096 had any previous exposure to the *specific pictures* in these experiments, let alone  
1097 with the partial images rendered through bubbles. Yet, it can be surmised that all  
1098 the subjects had had extensive previous experience with *other* images of objects  
1099 from those categories, including occluded versions of other animals, chairs, faces,  
1100 fruits and vehicles. In order to evaluate whether experience with occluded instances  
1101 of objects from a specific category is important to recognize novel instances of  
1102 partially visible objects from the same category, we conducted a new psychophysics  
1103 experiment with novel objects. We used 500 unique novel objects belonging to 5  
1104 categories, all the novel objects were chosen from the Tarr Lab stimulus repository  
1105 (29). An equal amount of stimuli were chosen from each category. One exemplar  
1106 from each category is shown in **Figure S8A**. In the Cognitive Science community, the  
1107 first three categories are known as “Fribbles” and the last two categories as  
1108 “Greebles” and “Yufos” (29). In our experiments, each category was assigned a Greek  
1109 letter name (**Figure S8A**) so as not to influence the subjects with potential meanings  
1110 of an invented name.

1111         The experiment followed the same protocol as the main experiment (**Figure**  
1112 **1**). Twenty-three new subjects (11 female, 20 to 34 years old) participated in this  
1113 experiment. Since the subjects had no previous exposure to these stimuli, they  
1114 underwent a short training session where they were presented with 2 fully visible  
1115 exemplars from each category so that they could learn the mapping between  
1116 categories and response buttons. In order to start the experiment, subjects were  
1117 required to get 8 out of 10 correct responses, 5 times in a row using these practice  
1118 stimuli. On average, reaching this level of accuracy required  $80 \pm 40$  trials. Those 2  
1119 stimuli from each category were not used in the subsequent experiments. Therefore,  
1120 whenever we refer to “novel” objects, what we mean is objects from 5 categories  
1121 where subjects were exposed to  $\sim 80$  trials of 2 fully visible exemplars per category,  
1122 different from the ones used in the psychophysics tests. This regime represented  
1123 our compromise of ensuring that subjects knew which button they had to press,

1124 while at the same time keeping only minimal initial training. Importantly, this initial  
1125 training only involved whole objects and subjects had no exposure to partial novel  
1126 objects before the onset of the psychophysics measurements. Halfway through the  
1127 experiment, we repeated 3 runs of the recognition test with the same 2 initial fully  
1128 visible exemplars as a control to ensure that subjects were still performing the task  
1129 correctly, and all subjects passed this control (>80% performance in just 3  
1130 consecutive runs).

1131 During the experiment, subjects were presented with 1,000 uniquely  
1132 rendered stimuli from 500 contrast-normalized gray scale novel objects, resized to  
1133 256x256 pixels, subtending approximately 5° of visual angle. All images were  
1134 contrast normalized using the `histMatch` function from the SHINE toolbox (30).  
1135 This function equates the luminance histogram of sets of images. For each subject,  
1136 1,000 unique renderings were obtained by applying different bubbles to the original  
1137 images, resulting in a total of 23,000 different stimuli across subjects.

1138 The SOAs and other parameters were identical to those used in the main  
1139 experiment. The analyses and models for the novel object experiments follow those  
1140 in the main experiment (**Figures S8B-D** are the analogs of **Figure 1F-H**, **Figure S9A**  
1141 is the analog of **Figure 3A**, **Figure S9B-D** are the analogs of **Figure 4B-D**).

1142

### 1143 **Neurophysiology experiments**

1144 The neurophysiological data analyzed in **Figures 2** and **3** were taken from  
1145 the study by Tang *et al* (25), to which we refer for further details. Briefly, subjects  
1146 were patients with pharmacologically intractable epilepsy who had intracranial  
1147 electrodes implanted for clinical purposes. These electrodes record intracranial field  
1148 potential signals, which represent aggregate activity from large numbers of neurons.  
1149 All studies were approved by the hospital's Institutional Review Board and were  
1150 carried out with the subjects' informed consent. Images of partial or whole objects  
1151 were presented for 150 ms, followed by a gray screen for 650 ms. Subjects  
1152 performed a five-alternative forced choice categorization task as described in  
1153 **Figure 1** with the following differences: (i) the physiological experiment did not  
1154 include the backward mask condition; (ii) 25 different objects were used in the

1155 physiology experiment; (iii) the SOA was fixed at 150 ms in the physiology  
1156 experiment.

1157         Bubbles were randomly positioned in each trial. In order to compare models,  
1158 behavior and physiology on an image-by-image basis, we had to set up a stimulus  
1159 set based on the exact images (same bubble locations) presented to a given subject  
1160 in the physiology experiment. To construct the stimulus set for the physiology-  
1161 based psychophysics experiment (**Figure 2**), we chose two electrodes according to  
1162 the following criteria: (i) those two electrodes had to come from different  
1163 physiology subjects (to ensure that the results were not merely based on any  
1164 peculiar properties of one individual physiology subject), (ii) the electrodes had to  
1165 respond both to whole objects and partially visible objects (to ensure a robust  
1166 response where we could estimate latencies in single trials), and (iii) the electrodes  
1167 had to show visual selectivity (to compare the responses to the preferred and non-  
1168 preferred stimuli). The electrode selection procedure was strictly dictated by these  
1169 criteria and was performed before even beginning the psychophysics experiment.  
1170 We extracted the images presented during the physiological recordings in  $n = 650$   
1171 trials for psychophysical testing. For the preferred category for each electrode, only  
1172 trials where the amplitude of the elicited neural response was in the top 50th  
1173 percentile were included, and trials were chosen to represent a distribution of  
1174 neural response latencies. After constructing this stimulus set, we performed  
1175 psychophysical experiments with  $n = 33$  new subjects (Physiology-based  
1176 psychophysics experiment) to evaluate the effect of backward masking for the exact  
1177 same images for which we had physiological data.

1178         For the physiological data, we focused on the neural latency, defined as the  
1179 time of the peak in the physiological response, as shown in **Figure 2B**. These  
1180 latencies were computed in single trials (see examples in **Figure 2C**). Because these  
1181 neural latencies per image are defined in single trials, there are no measures of  
1182 variation in the x-axis in **Figure 2F** or **Figure 3C-D**. A more extensive analysis of the  
1183 physiological data, including extensive discussion of many ways of measuring neural  
1184 latencies, was presented in (25).

1185

1186 **Behavioral and neural data analysis**

1187 *Masking Index.* To quantify the effect of backward masking, we defined the masking  
1188 index as 100%-pAUC, where pAUC is the percent area under the curve when  
1189 plotting performance as a function of SOA (e.g. **Figure 2E**). To evaluate the  
1190 variability in the masking index, we used a half-split reliability measure by  
1191 randomly partitioning the data into two halves and computing the masking index  
1192 separately in each half. **Figure S2** provides an example of such a split. Error bars in  
1193 **Figure 2F** constitute half-split reliability values.

1194

1195 *Correlation between masking index and neural latency.* To determine the correlation  
1196 between masking index and neural response latency, we combined data from the  
1197 two recording sites by first standardizing the latency measurements (z-score,  
1198 **Figure 2F**). We then used a linear regression on neural response latency with  
1199 masking index, percent visibility, and recording site as predictor factors to avoid any  
1200 correlations dictated by task difficulty or differences between recording sites.  
1201 We used only trials from the preferred category for each recording site and reported  
1202 the correlation and statistical significance in **Figure 2F**. There was no significant  
1203 correlation between the masking index and neural latency when considering trials  
1204 from the non-preferred category.

1205

1206 *Correlation between model distance and neural response latency.* As described below,  
1207 we simulated the activity of units in several computational models in response to  
1208 the same images used in the psychophysics and physiology experiments. To  
1209 correlate the model responses with neural response latency, we computed the  
1210 Euclidean distance between the model representation of partial and whole objects.  
1211 We computed the distance between each partial object in the physiology-based  
1212 psychophysics experiment stimulus set and the centroid of the whole images from  
1213 the same category (distance-to-category). We then assessed significance by using a  
1214 linear regression on the model distance versus neural response latency while  
1215 controlling for masking index, percent visibility, and recording site as factors.

1216

## 1217 **Feed-forward Models**

1218 We considered the ability to recognize partially visible images by state-of-  
1219 the-art feed-forward computational models of vision (**Figure 3A, Figure S3** and  
1220 **Figure S4**). First, we evaluated whether it was possible to perform recognition  
1221 purely based on pixel intensities. Next, in the main text we evaluated the  
1222 performance of the AlexNet model (31). AlexNet is an eight-layer deep convolutional  
1223 neural network consisting of convolutional, max-pooling and fully-connected layers  
1224 with a large number of weights trained in a supervised fashion for object  
1225 recognition on ImageNet, a large collection of labeled images from the web (31, 32).  
1226 We used a version of AlexNet trained using *caffe* (33), a deep learning library. Two  
1227 layers within the AlexNet were tested: pool5 and fc7. Pool5 is the last convolutional  
1228 (retinotopic) layer in the architecture. fc7 is the last layer before the classification  
1229 step and is fully connected, that is, every unit in fc7 is connected to every unit in the  
1230 previous layer. The number of features used to represent each object was  
1231  $256 \times 256 = 65536$  for pixels, 9216 for pool5 and 4096 for fc7.

1232 We also considered many other similar feed-forward models: VGG16 block5,  
1233 fc1 and fc2 (25088, 4096 and 4096 features respectively) (34), VGG19 fc1 and fc2  
1234 (4096 features each) (34), layers 40 to 49 of ResNet50 (200704 to 2048 features)  
1235 (35), and InceptionV3 mixed 10 layer (131072 features) (36). In all of these cases,  
1236 we used models pre-trained for the ImageNet 2012 data set and randomly  
1237 downsampled the number of features to 4096 as in AlexNet. Results for all of these  
1238 models are shown in **Figure S4**; more layers and models can be found in the  
1239 accompanying web site:

1240 [http://klab.tch.harvard.edu/resources/Tangetal\\_RecurrentComputations.html](http://klab.tch.harvard.edu/resources/Tangetal_RecurrentComputations.html)

1241 Classification performance for each model was evaluated on a stimulus set  
1242 consisting of 13,000 images of partial objects (generated from 325 objects from 5  
1243 categories). These were the same partial objects used to collect human performance  
1244 in the main experiment (**Figure 1**). We used a support vector machine (SVM) with a  
1245 linear kernel to perform classification on the features computed by each model. We  
1246 used 5-fold cross-validation across the 325 objects. Each split contained 260 objects  
1247 for training, and 65 objects split for validation and testing, such that each object was



1248 used exactly in one validation and testing split, and such that there was an equal  
1249 number of objects from each category in each split. Decision boundaries were fit on  
1250 the training set using the SVM with the C parameter determined through the  
1251 validation set by considering the following possible C values:  $10^{-4}$ ,  $10^{-3}$ , ...,  $10^3$ ,  $10^4$ .  
1252 The SVM boundaries were fit using images of whole objects and tested on images of  
1253 partial objects. Final performance numbers for partial objects were calculated on  
1254 the full data set of 13,000 images -- that is, for each split, classification performance  
1255 was evaluated on the partial objects corresponding to the objects in the test set,  
1256 such that, over all splits, each partial object was evaluated exactly once.

1257 As indicated above, all the results shown on **Figure 3A**, **Figure S3** and  
1258 **Figure S4** are based on models that were trained on the ImageNet 2012 data set  
1259 and then tested using our stimulus set. We also tested a model created by fine-  
1260 tuning the AlexNet network. We fine-tuned AlexNet using the set of whole objects in  
1261 our data set and then re-examined the model's performance under the low visibility  
1262 conditions in **Figure S5**. We fine-tuned AlexNet by replacing the original 1000-way  
1263 fully-connected classifier layer (fc8) trained on ImageNet with a 5-way fully-  
1264 connected layer (fc8') over the categories in our dataset and performing back-  
1265 propagation over the entire network. We again performed cross validation over  
1266 objects, choosing final weights by monitoring validation accuracy. To be consistent  
1267 with previous analysis, after fine-tuning the representation, we used an SVM  
1268 classifier on the resulting fc7 activations.

1269 To graphically display the representation of the images based on all 4096  
1270 units in the fc7 layer of the model in a 2D plot (**Figure 4C**), we used stochastic  
1271 neighborhood embedding (t-SNE) (37). We note that this was done exclusively for  
1272 display purposes and all the analyses, including distances, classification and  
1273 correlations, are based on the model representation with all the units in the  
1274 corresponding layer as described above. For each model and each image, we  
1275 computed the Euclidian distance between the model's representation and the mean  
1276 point across all whole objects within the corresponding category. This distance-to-  
1277 category corresponds to the y-axis in **Figure 3B-C**.

1278

## 1279 **Recurrent Neural Network Models**

1280 A recurrent neural network (RNN) was constructed by adding all-to-all  
1281 recurrent connections to different layers of the bottom-up convolutional networks  
1282 described in the previous section (for example, to the fc7 layer of AlexNet in **Figure**  
1283 **4A**). We first describe here the model for AlexNet; a similar procedure was followed  
1284 for the other computational models. An RNN consists of a state vector that is  
1285 updated according to the input at the current time step and its value at the previous  
1286 time step. Denoting  $\mathbf{h}_t$  as the state vector at time  $t$  and  $\mathbf{x}_t$  as the input into the  
1287 network at time  $t$ , the general form of the RNN update equation is  $\mathbf{h}_t = f(\mathbf{W}_h \mathbf{h}_{t-1}, \mathbf{x}_t)$   
1288 where  $f$  introduces a non-linearity as defined below. In our model,  $\mathbf{h}_t$  represents the  
1289 fc7 feature vector at time  $t$  and  $\mathbf{x}_t$  represents the feature vector for the previous  
1290 layer, fc6, multiplied by the transition weight matrix  $\mathbf{W}_{6 \rightarrow 7}$ . For simplicity, the first  
1291 six layers of AlexNet were kept fixed to their original feed-forward versions.

1292 We chose the weights  $\mathbf{W}_h$  by constructing a Hopfield network (38),  $\text{RNN}_h$ , as  
1293 implemented in MATLAB's `newhop` function, which is a modified version of the  
1294 original description by Hopfield (39). Since this implementation is based on binary  
1295 unit activity, we first converted the scalar activities in  $\mathbf{x}$  to  $\{-1, +1\}$  by mapping those  
1296 values greater than 0 to +1 and all other values to -1. Depending on the specific layer  
1297 and model, this binarization step in some cases led to either an increase or a  
1298 decrease in performance (even before applying the attractor network dynamics); all  
1299 the results shown in the Figures report the results after applying the Hopfield  
1300 dynamics. The weights in  $\text{RNN}_h$  are symmetric ( $W_{ij} = W_{ji}$ ) and are dictated by the

1301 Hebbian learning rule  $W_{ij} = \frac{1}{n_p} \sum_{p=1}^{n_p} x_i^p x_j^p$  where the sum goes over the  $n_p$  patterns of

1302 whole objects to be stored (in our case  $n_p=325$ ) and  $x_i^p$  represents the activity of  
1303 unit  $i$  in response to pattern  $p$ . This model does not have any free parameters that  
1304 depend on the partial objects and the weights are uniquely specified by the activity  
1305 of the feed-forward network in response to the whole objects. After specifying  $\mathbf{W}_h$ ,  
1306 the activity in  $\text{RNN}_h$  was updated according to  $\mathbf{h}_0 = \mathbf{x}$  and  $\mathbf{h}_t = \text{satlins}(\mathbf{W}_h \mathbf{h}_{t-1} + \mathbf{b})$  for  
1307  $t > 0$  where *satlins* represents the saturating linear transfer function,

1308  $\text{satlins}(z) = \max(\min(1, z), -1)$  and  $\mathbf{b}$  introduces a constant bias term. The activity in  
1309  $\text{RNN}_h$  was simulated until convergence, defined as the first time point where there  
1310 was no change in the sign of any of the features between two consecutive time  
1311 points.

1312 To evaluate whether the increase in performance obtained in the  $\text{RNN}_h$  was  
1313 specific to the AlexNet architecture, we also implemented recurrent connections  
1314 added onto other networks. **Figure S7** shows a comparison between performance of  
1315 the VGG16 network layer fc1 (34) and a VGG16 fc1 model endowed with additional  
1316 recurrent connections in the same format as used with AlexNet. We used the time  
1317 steps of the Hopfield network that yielded maximal performance. The  
1318 VGG16+Hopfield model also showed performance improvement with respect to the  
1319 purely bottom-up VGG16 counterpart. Several additional models were tested for  
1320 other layers of AlexNet, VGG16, VGG19, ResNet and InceptionV3, showing a  
1321 distribution with different degrees of consistent improvement upon addition of the  
1322 recurrent connectivity (shown in the accompanying web material at  
1323 [http://klab.tch.harvard.edu/resources/Tangetal\\_RecurrentComputations.html](http://klab.tch.harvard.edu/resources/Tangetal_RecurrentComputations.html)).

1324 We ran an additional simulation with the RNN models to evaluate the effects  
1325 of backward masking (**Figure 4F**). For this purpose, we simulated the response of  
1326 the feed-forward AlexNet model to the same masks used for the psychophysical  
1327 experiments to determine the fc6 features for each mask image. Next, we used this  
1328 mask as the fixed input  $\mathbf{x}_t$  into the recurrent network, at different time points after  
1329 the initial image input.

1330

## 1331 **2. Supplementary Discussion**

1332

### 1333 **Partially visible versus occluded objects**

1334 In most of the experiments, we rendered objects partially visible by  
1335 presenting them through “bubbles” (**Fig. 1C**) in an attempt to distill the basic  
1336 mechanisms required for spatial integration during pattern completion. It was  
1337 easier to recognize objects behind a real occluder (**Fig. 1D, S1, (40)**). The results

1338 presented here were qualitatively similar (**Fig. S1**) when using explicit occluders  
1339 (**Fig. 1D**): recognition of occluded objects was also disrupted by backward masking  
1340 (**Fig. 1I, S1**). As expected, performance was higher for the occlusion versus the  
1341 bubbles condition.

1342

### 1343 **“Unfolding” recurrent neural networks into feed-forward neural networks**

1344 Before examining computational models including recurrent connections, we  
1345 analyzed bottom-up architectures and showed that they were *not* robust to  
1346 extrapolating from whole objects to partial objects (**Figure 4**). However, there exist  
1347 infinitely many possible bottom-up models. Hence, even though we examined state-  
1348 of-the-art models that are quite successful in object recognition, the failure to  
1349 account for the behavioral and physiological results in the bottom-up models  
1350 examined here (as well as similar failures reported in other studies, e.g. (41, 42))  
1351 should be interpreted with caution. We do not imply that it is impossible for *any*  
1352 bottom-up architecture to recognize partially visible objects. In fact, it is possible to  
1353 unfold a recurrent network with a finite number of time steps into a bottom-up  
1354 model by creating an additional layer for each additional time step. However, there  
1355 are several advantages to performing those computations with a recurrent  
1356 architecture including a drastic reduction in the number of units required as well as  
1357 in the number of weights that need to be trained and the fact that such unfolding is  
1358 applicable only when we know *a priori* the fixed number of computational steps  
1359 required, in contrast with recurrent architectures that allow an arbitrary and  
1360 variable number of computations.

1361

### 1362 **Recurrent computations and “slower” integration**

1363 A related interpretation of the current findings is that more challenging  
1364 tasks, such as recognizing objects from minimal pixel information, may lead to  
1365 “slower processing” throughout the ventral visual stream. According to this idea,  
1366 each neuron would receive weaker inputs and require a longer time for integration,  
1367 leading to the longer latencies observed experimentally at the behavioral and  
1368 physiological level. It seems unlikely that the current observations could be fully

1369 accounted by longer integration times at all levels of the visual hierarchy. First, all  
1370 images were contrast normalized to avoid any overall intensity effects. Second,  
1371 neural delays for poor visibility images were not observed in early visual areas (25).  
1372 Third, the correlations between the effects of backward masking and neural delays  
1373 persisted even after accounting for difficulty level (**Fig. 3**). Fourth, none of the state-  
1374 of-the-art purely bottom-up computational models were able to account for human  
1375 level performance (see further elaboration of this point below). These arguments  
1376 rule out slower processing throughout the entire visual system due to low intensity  
1377 signals in the lower visibility conditions. However, the results presented here are  
1378 still compatible with the notion that the inputs to higher-level neurons in the case of  
1379 partial objects could be weaker and could require further temporal integration. This  
1380 possibility is consistent with the model proposed here. Because the effects of  
1381 recurrent computations are delayed with respect to the bottom-up inputs, we  
1382 expect that any such slow integration would have to interact with the outputs of  
1383 recurrent signals.

1384

### 1385 **Extensions to the proposed proof-of-concept architecture**

1386 A potential challenge with attractor network architectures is the pervasive  
1387 presence of spurious attractor states, particularly prominent when the network is  
1388 near capacity. Furthermore, the simple instantiation of a recurrent architecture  
1389 presented here still performed below humans, particularly under very low visibility  
1390 conditions. It is conceivable that more complex architectures that take into account  
1391 the known lateral connections in every layer as well as top-down connections in  
1392 visual cortex might improve performance even further. Additionally, future  
1393 extensions will benefit from incorporating other cues that help in pattern  
1394 completion such as relative positions (front/behind), segmentation, movement,  
1395 source of illumination, and stereopsis, among others.

1396

### 1397 **Mixed training regime**

1398 All the computational results shown in the main text and discussed thus far  
1399 involve training models *exclusively* with whole objects and testing performance with

1400 images of partially visible objects. Here we discuss a “mixed training” regime where  
 1401 the models are trained with access to partially visible objects. As emphasized in the  
 1402 main text, these are weaker models since they show less extrapolation (from  
 1403 partially visible objects to other partially visible objects as opposed to from whole  
 1404 objects to partially visible objects) and they depart from the typical ways of  
 1405 assessing invariance to object transformations (e.g. training at one rotation and  
 1406 testing at other rotations). Furthermore, humans do not require this type of  
 1407 additional training as described in the novel object experiments reported in **Figures**  
 1408 **S8** and **S9**. Despite these caveats, the mixed training regime is interesting to explore  
 1409 because it seems natural to assume that, at least in some cases, humans may be  
 1410 exposed to both partially visible objects and their whole counterparts while learning  
 1411 about objects. We emphasize that we cannot directly compare models that are  
 1412 trained only with whole objects and models that are trained with both whole objects  
 1413 and partially visible ones.

1414 We considered two different versions of RNN models that were trained to  
 1415 reconstruct the feature representations of the whole objects from the feature  
 1416 representations of the corresponding partial objects. These models were based on a  
 1417 mixed training regime whereby both whole objects and partial objects were used  
 1418 during training. The state at time  $t > 0$  was computed as the activation of the  
 1419 weighted sum of the previous state and the input from the previous  
 1420 layer:  $\mathbf{h}_t = \text{ReLU}(\mathbf{W}_h \mathbf{h}_{t-1}, \mathbf{x}_t)$  where  $\text{ReLU}(z) = \max(0, z)$ . The loss function was the  
 1421 mean squared Euclidean distance between the features from the partial objects and  
 1422 the features from the whole objects. Specifically, the RNN was iterated for a fixed  
 1423 number of time steps ( $t_{\max} = 4$ ) after the initial feed-forward pass, keeping the input  
 1424 from fc6 constant. Thus, letting  $\mathbf{h}_{t_{\max}}^i$  be the RNN state at the last time step for a given  
 1425 image  $i$  and  ${}_{\text{whole}}\mathbf{h}_{t_0}^i$  be the feed-forward feature vector of the corresponding whole  
 1426 image, the loss function has the form

$$1427 \quad E = \frac{1}{T_l} \sum_{i=1}^{T_l} \left[ \frac{1}{T_u} \sum_{j=1}^{T_u} (h_{t_{\max}}^i[j] - {}_{\text{whole}}h_{t_0}^i[j])^2 \right]$$

1428 where  $j$  goes over all the  $T_u$  units in fc7 and  $i$  goes over all the  $T_l$  images in the  
1429 training set. The RNN was trained in a cross validated fashion (5 folds) using the  
1430 same cross validation scheme as with the feed-forward models and using the  
1431 RMSprop algorithm for optimization. In RNN<sub>5</sub>, the weights of the RNN were trained  
1432 with 260 objects for each fold. All of the partial objects from the psychophysics  
1433 experiment for the given 260 objects, as well as one copy of the original 260 images,  
1434 were used to train the RNN for the corresponding split. In the case where the input  
1435 to the RNN was the original image itself, the network did not change its  
1436 representation over the recurrent iterations. Given the high number of weights to  
1437 be learned by the RNN as compared to the number of training examples, the RNNs  
1438 overfit fairly quickly. Therefore, early stopping (10 epochs) was implemented as  
1439 determined from the validation set, i.e., we used the weights at the time step where  
1440 the validation error was minimal.

1441 To evaluate the extent of extrapolation across categories, we considered an  
1442 additional version, RNN<sub>1</sub>. In RNN<sub>1</sub>, the recurring weights were trained using objects  
1443 from only one category and the model was tested using objects from the remaining  
1444 4 categories. In all RNN versions, once  $\mathbf{W}_h$  was fixed, classification performance was  
1445 assessed using a linear SVM, as with the feed-forward models. Specifically, the SVM  
1446 boundaries were trained using the responses from the feed-forward model to the  
1447 whole objects and performance was evaluated using the representation at different  
1448 time steps of recurrent computation.

1449 The RNN<sub>5</sub> model had 40962 recurrent weights trained on a subset of the  
1450 objects from all five categories. The RNN<sub>5</sub> model matched or surpassed human  
1451 performance (**Figure S11**). Considering all levels of visibility, the RNN<sub>5</sub> model  
1452 performed slightly above human levels ( $p=3 \times 10^{-4}$ , Chi-squared test). While the RNN<sub>5</sub>  
1453 model can extrapolate across objects and categorize images of partial objects that it  
1454 has not seen before, it does so by exploiting features that are similar for different  
1455 objects within the 5 categories in the experiment. RNN<sub>1</sub>, a model where the  
1456 recurrent weights were trained using solely objects from one of the categories and  
1457 performance was evaluated using objects from the remaining 4 categories, did not  
1458 perform any better than the purely feed-forward architecture ( $p=0.05$ , Chi-squared

1459 test). Upon inspection of the fc7 representation, we observed that several of the  
1460 features were sparsely represented across categories. Therefore, the recurrent  
1461 weights in RNN<sub>1</sub> only modified a fraction of all the possible features, missing many  
1462 important features to distinguish the other objects. Thus, the improvement in  
1463 RNN<sub>5</sub> is built upon a sufficiently rich dictionary of features that are shared among  
1464 objects within a category. These results show that recurrent neural networks  
1465 trained with subsets of the partially visible objects can achieve human level  
1466 performance, extrapolating across objects, as long as they are trained with a  
1467 sufficiently rich set of features.

1468 We also evaluated the possibility of training the bottom-up model (AlexNet)  
1469 using the mixed training regime and the same loss function as with RNN<sub>5</sub> and RNN<sub>1</sub>,  
1470 i.e. the Euclidean distance between features of whole and occluded images. Using  
1471 the fc7 representation of the AlexNet model trained with partially visible objects  
1472 also led to a model that either matched or surpassed human level performance at  
1473 most visibility levels (**Figure S11**). The bottom-up model in the mixed training  
1474 regime showed slightly worse performance than humans at very high visibility  
1475 levels, including whole objects, perhaps because of the extensive fine-tuning with  
1476 partially visible objects (note performance above humans at extremely low visibility  
1477 levels). Within the mixed-training regimes, the RNN<sub>5</sub> model slightly outperformed  
1478 the bottom-up model (**Figure S11**).

1479 A fundamental distinction between the models presented in the text,  
1480 particularly RNN<sub>h</sub>, and the models introduced here, is that the mixed training  
1481 models require training with partial objects from the same categories in which they  
1482 will be evaluated. Although the specific photographs of objects used in the  
1483 psychophysics experiments presented here were new to the subjects, humans have  
1484 extensive experience in recognizing similar objects from partial information. It  
1485 should also be noted that there is a small number of partially visible images in  
1486 ImageNet, albeit not with such low visibility levels as the ones explored here, and all  
1487 the models considered here were pre-trained using ImageNet. Yet, the results  
1488 shown in **Figures S8-S9** demonstrate that humans can recognize objects shown  
1489 under low visibility conditions even when they have had no experience with partial



1490 objects of a specific category and have had only minimal experience with the  
1491 corresponding whole objects.

1492

### 1493 **Temporal scale for recurrent computations**

1494 The models presented here, and several discussions in the literature,  
1495 schematically and conceptually separate feed-forward computations from within-  
1496 layer recurrent computations. Physiological signals arising within  $\sim 150$  ms after  
1497 stimulus onset have been interpreted to reflect largely feed-forward processing (1,  
1498 3, 5, 8, 10, 11, 43), whereas signals arising in the following 50 to 100 ms may reflect  
1499 additional recurrent computations (27, 44, 45). This distinction is clearly an  
1500 oversimplification: the dynamics of recurrent computations can very well take place  
1501 quite rapidly and well within  $\sim 150$  ms of stimulus onset (46). Rather than a  
1502 schematic initial feed-forward path followed by recurrent signals within the last  
1503 layer in discrete time steps as implemented in  $RNN_h$ , cortical computations are  
1504 based on continuous time and continuous interactions between feed-forward and  
1505 within-layer signals (in addition to top-down signals). A biologically plausible  
1506 implementation of a multi-layered spiking network including both feed-forward and  
1507 recurrent connectivity was presented in ref. (46), where the authors estimated that  
1508 recurrent signaling can take place within  $\sim 15$  ms of computation per layer. Those  
1509 time scales are consistent with the results shown here. Recurrent signals offer  
1510 dynamic flexibility in terms of the amount of computational processing. Under noisy  
1511 conditions (an injected noise term added to modify the input to each layer in (46),  
1512 more occlusion in our case, and generally any internal or external source of noise),  
1513 the system can dynamically use more computations to solve the visual recognition  
1514 challenge.

1515 **Figures 4C-F, S10, S11, and S12** show dynamics evolving over tens of  
1516 discrete recurrent time steps. The  $RNN_h$  model performance and correlation with  
1517 humans saturate within approximately 10-20 recurrent steps (**Fig. 4C-F**).  
1518 Membrane time constants of 10-15 ms (47) and one time constant per recurrent  
1519 step would necessitate hundreds of milliseconds. Instead, the behavioral and  
1520 physiological delays accompanying recognition of occluded objects occur within a

1521 delay of 50 to 100 ms (**Fig. 1-2, S12**) (25, 48), which are consistent with a  
1522 continuous time implementation of recurrent processing (46).

1523

### 1524 **3. Supplementary Figures Legends**

1525

#### 1526 **Figure S1: Robust performance with occluded stimuli**

1527 We measured categorization performance with masking (solid lines) or without  
1528 masking (dashed lines) for **(A)** partial and **(B)** occluded stimuli on a set of 16  
1529 exemplars belonging to 4 categories (chance = 25%, dashed lines). There was no  
1530 overlap between the 14 subjects that participated in **(A)** and the 15 subjects that  
1531 participated in **(B)**. The effect of backward masking was consistent across both  
1532 types of stimuli. The black lines indicate whole objects and the gray lines indicate  
1533 the partial and occluded objects. Error bars denote SEM.

1534

#### 1535 **Figure S2: Example half-split reliability of psychophysics data**

1536 **Figure 2E** in the main text reports the masking index, a measure of how much  
1537 recognition of each individual image is affected by backward masking. This measure  
1538 is computed by averaging performance across subjects. In order to evaluate the  
1539 variability in this metric, we randomly split the data into two halves and computed  
1540 the masking index for each image for each half of the data. This figure shows one  
1541 such split and how well one split correlates with the other split. **Figure 2F** shows  
1542 error bars defined by computing standard deviations of the masking indices from  
1543 100 such random splits.

1544

#### 1545 **Figure S3: Bottom-up models can recognize minimally occluded images**

1546 **A.** Extension to **Figure 3A** showing that bottom-up models successfully recognize  
1547 objects when more information is available (**Figure 3A** showed visibility values up  
1548 to 35% whereas this figure extends visibility up to 100%). The format and  
1549 conventions are the same as those in **Figure 3A**. The black dotted line shows  
1550 interpolated human performance between the psychophysics experimental values  
1551 measured at 35% and 100% visibility levels.

1552 **(B)** Stochastic neighborhood embedding dimensionality reduction (t-SNE, **Methods**)  
1553 to visualize the fc7 representation in the AlexNet model for whole objects (open  
1554 circles) and partial objects (closed circles). Different categories are separable in this  
1555 space, but the boundaries learned on whole objects did not generalize to the space of  
1556 partial objects. The black arrow shows a schematic example of model distance  
1557 definition, from an image of a partial face (green circle) to the average face centroid  
1558 (black cross).

1559

1560 **Figure S4: All of the purely feed-forward models tested were impaired under**  
1561 **low visibility conditions**

1562 The human, AlexNet-pool5 and AlexNet-fc curves are the same ones shown in  
1563 **Figure 3A** and are reproduced here for comparison purposes. This figure shows  
1564 performance for several other models: VGG16-fc2, VGG19-fc2, ResNet50-flatten,  
1565 inceptionV3-mixed10, VGG16-block5 (see text for references). In all cases, these  
1566 models were pre-trained to optimize performance under ImageNet 2012 and there  
1567 was no additional training (see also **Figure S5**). An expanded version of this figure  
1568 with many other layers and models can be found on our web site:

1569 [http://klab.tch.harvard.edu/resources/Tangetal\\_RecurrentComputations.html](http://klab.tch.harvard.edu/resources/Tangetal_RecurrentComputations.html)

1570

1571 **Figure S5: Fine-tuning did not improve performance under heavy occlusion**

1572 The human and fc7 curves are the same ones shown in **Figure 3A** and are  
1573 reproduced here for comparison purposes. The pre-trained AlexNet network used  
1574 in the text was fine tuned using back-propagation with the set of *whole* images from  
1575 the psychophysics experiment (in contrast with the pre-trained Alexnet network  
1576 which was trained using the Imagenet 2012 data set). The fine-tuning involved all  
1577 layers (**Methods**).

1578

1579 **Figure S6: Correlation between  $RNN_h$  model and human performance for**  
1580 **individual objects as a function of time**

1581 At each time step in the recurrent neural network model ( $RNN_h$ ), the scatter plots  
1582 show the relationship between the model's performance on individual partial

1583 exemplar objects and human performance. Each dot is an individual exemplar  
1584 object. In **Figure 4E** we report the average correlation coefficient across all  
1585 categories.

1586

1587 **Figure S7: Adding recurrent connectivity to VGG16 also improved**  
1588 **performance**

1589 This Figure parallels the results shown in **Figure 4B** for AlexNet, here using the  
1590 VGG16 network, implemented in keras (**Methods**). The results shown here are  
1591 based on using 4096 units from the fc1 layer. The red curve (vgg16-fc1)  
1592 corresponds to the original model without any recurrent connections. The  
1593 implementation of the RNN<sub>h</sub> model here (VGG16-fc1-Hopfield) is similar to the one  
1594 in **Figure 4B**, except that here we use the VGG16 fc1 activations instead of the  
1595 AlexNet fc7 activations. An expanded version of this figure with similar results for  
1596 several other layers and models can be found on our web site:

1597 [http://klab.tch.harvard.edu/resources/Tangetal\\_RecurrentComputations.html](http://klab.tch.harvard.edu/resources/Tangetal_RecurrentComputations.html)

1598

1599 **Figure S8: Robust recognition of *novel* objects under low visibility conditions**

1600 **A.** Single exemplar from each of the 5 novel object categories (**Methods**).  
1601 **(B-C)** Behavioral performance for the unmasked (**B**) and masked (**C**) trials. The  
1602 experiment was identical to the one in **Figure 1** and the format of this figure follows  
1603 that in **Figure 1F-G**. The colors denote different SOAs. Error bars=SEM. Dashed line  
1604 = chance level (20%). Bin size=2.5%. Note the discontinuity in the x-axis to report  
1605 performance for whole objects (100% visibility). **(D)** Average recognition  
1606 performance as a function of the stimulus onset asynchrony (SOA) for partial objects  
1607 (same data and conventions as **B-C**, excluding 100% visibility). Error bars=SEM.  
1608 Performance was significantly degraded by masking (solid) compared to the  
1609 unmasked trials (dotted) ( $p < 0.0001$ , Chi-squared test, d.f.=4).

1610

1611 **Figure S9: The performance of feed-forward and recurrent computational**  
1612 **models for *novel* objects was similar to those for known object categories**

1613 **A.** Performance of feed-forward computational models (format as in **Figure 3A**) for  
1614 novel objects.  
1615 **B.** Performance of the recurrent neural network  $RNN_h$  (format as in **Figure 4B**) for  
1616 novel objects.  
1617 **C.** Temporal evolution of the feature representation for  $RNN_h$  (format as in **Figure**  
1618 **4C**). The colors and greek letters denote the five object categories (see examples in  
1619 **Figure S8A**).  
1620 **D.** Performance of  $RNN_h$  as a function of recurrent time for novel objects (format as  
1621 in **Figure 4D**).

1622

1623 **Figure S10: Side-by-side comparison of neurophysiological signals,**  
1624 **psychophysics and computational model**

1625 **A.** Adaptation of Figure 6C from Tang et al 2014. This figure shows the dynamics of  
1626 decoding object information for whole objects and (black) and partial objects (gray)  
1627 from neurophysiological recordings as a function of time post stimulus onset (see  
1628 Tang et al 2014 for details).

1629 **B.** Reproduction of **Figure 1H** (behavior).

1630 **C.** Reproduction of **Figure 4F** ( $RNN_h$  model).

1631 Above each subplot, the experiment schematic highlights that part **A** involves no  
1632 masking and fixed SOA = 150 ms whereas parts **B** and **C** involve masking and  
1633 variable SOAs. The inset in part **C** directly overlays the results of the  $RNN_h$  model in  
1634 part **C** onto the results of the psychophysics experiment in part **B**. In order to create  
1635 this plot, we mapped 0 time steps to 25ms, 256 time steps to 150 ms and linearly  
1636 interpolated the time steps in between.

1637

1638 **Figure S11: Mixed training regimes.**

1639 **A.** This figure follows the format of **Fig3A, 4B** and **S3, S4, S5, S7, S9A-B**. The black  
1640 line shows human performance and is copied from **Fig. 3A**. The green and blue lines  
1641 show the recurrent model ( $RNN_5$ ) and bottom-up model (AlexNet fc7), respectively,  
1642 trained in a mixed regime that included the occluded objects with visibility levels  
1643 within the gray rectangle (the same ones used to evaluate human psychophysics

1644 performance). In the RNN5 model, there were ~16 million weights trained (all-to-all  
1645 in the fc7 layer) whereas in the Alexnet fc7 model, there were ~60 million weights  
1646 trained (all the weights across layers in the Alexnet model). Cross-validated test  
1647 performance is shown here as well as in the other figures throughout the  
1648 manuscript. As noted in the text, we emphasize that this figure involves a different  
1649 training regime from the ones in the previous figures and therefore one cannot  
1650 directly compare performance with the previous figures.

1651 **B.** This figure follows the format of **Fig. 4E**. The green and blue bars show the  
1652 correlation between human and model for the recurrent model and bottom-up  
1653 model, respectively, both trained using occluded objects. The gray rectangle shows  
1654 human-human correlation, see **Fig. 4E** for details..

1655

#### 1656 **Figure S12: Image-by-image comparison between RNNh model performance** 1657 **and human performance in the masked condition**

1658 Expanding on **Figure 4E**, this figure shows the correlation coefficient between  
1659 human recognition performance in the masked condition (**Figure 1B**) at a given  
1660 SOA (y-axis) and RNN<sub>h</sub> model performance at a given time step (x-axis). The top row  
1661 shows the unmasked condition (**Figure 1A**). In this figure, there is no mask for the  
1662 model (see **Figure 4F** for model performance with a mask). The computation of the  
1663 correlation coefficient follows the same procedure illustrated in **Figure S6** and **4E**.  
1664 The color scale for the correlation coefficient is shown on the right. As an upper  
1665 bound and as shown in **Figure 4E**, the correlation coefficient between different  
1666 human subjects was 0.41 for the unmasked condition. The yellow boxes highlight  
1667 the highest correlation for a given SOA value.

1668

#### 1669 **4. Author contributions**

1670 Conceptualization: HT, BL, MS, DC, GK

1671 Physiology experiment design: HT, GK

1672 Physiological data collection and analyses: HT

1673 Psychophysics experiment design: HT, BL, MS, CM, GK

1674 Psychophysics data collection: HT, BL, MS, AP, JO, WH, CM

1675 Computational models: HT, BL, MS, DC, CM, GK

1676 Resources: DC, GK

1677 Manuscript writing: HT, BL, MS, GK

1678

## 1679 **5. Data availability**

1680 All relevant data and code (including image databases, behavioral measurements,  
1681 physiological measurements and computational algorithms) are publicly available  
1682 through the lab's website and through the lab's GitHub page:

1683 [http://klab.tch.harvard.edu/resources/Tangetal\\_RecurrentComputations.html](http://klab.tch.harvard.edu/resources/Tangetal_RecurrentComputations.html)

1684

## 1685 **6. References**

1686

- 1687 1. Kirchner H & Thorpe SJ (2006) Ultra-rapid object detection with saccadic eye  
1688 movements: visual processing speed revisited. *Vision research* 46(11):1762-  
1689 1776.
- 1690 2. Potter M & Levy E (1969) Recognition memory for a rapid sequence of  
1691 pictures. *Journal of experimental psychology* 81(1):10-15.
- 1692 3. Keyser C, Xiao DK, Foldiak P, & Perret DI (2001) The speed of sight. *Journal*  
1693 *of Cognitive Neuroscience* 13(1):90-101.
- 1694 4. Hung CP, Kreiman G, Poggio T, & DiCarlo JJ (2005) Fast Read-out of Object  
1695 Identity from Macaque Inferior Temporal Cortex. *Science* 310:863-866.
- 1696 5. Liu H, Agam Y, Madsen JR, & Kreiman G (2009) Timing, timing, timing: Fast  
1697 decoding of object information from intracranial field potentials in human  
1698 visual cortex. *Neuron* 62(2):281-290.
- 1699 6. Tovee M & Rolls E (1995) Information encoding in short firing rate epochs by  
1700 single neurosn in the primate temporal visual cortex. *Visual Cognition*  
1701 2(1):35-58.
- 1702 7. Pinto N, Doukhan D, DiCarlo JJ, & Cox DD (2009) A high-throughput screening  
1703 approach to discovering good forms of biologically inspired visual  
1704 representation. *PLoS Comput Biol* 5(11):e1000579.
- 1705 8. Riesenhuber M & Poggio T (1999) Hierarchical models of object recognition  
1706 in cortex. *Nature Neuroscience* 2(11):1019-1025.
- 1707 9. Wallis G & Rolls ET (1997) Invariant face and object recognition in the visual  
1708 system. *PROGRESS IN NEUROBIOLOGY* 51(2):167-194.
- 1709 10. Yamins DL, *et al.* (2014) Performance-optimized hierarchical models predict  
1710 neural responses in higher visual cortex. *Proceedings of the National Academy*  
1711 *of Sciences of the United States of America* 111(23):8619-8624.
- 1712 11. Serre T, *et al.* (2007) A quantitative theory of immediate visual recognition.  
1713 *Progress In Brain Research* 165C:33-56.
- 1714 12. Breitmeyer B & Ogmen H (2006) *Visual Masking: Time Slices through*  
1715 *Conscious and Unconscious Vision* (Oxford University Press, New York).

- 1716 13. Bridgeman B (1980) Temporal response characteristics of cells in monkey  
1717 striate cortex measured with metacontrast masking and brightness  
1718 discrimination. *Brain Res* 196(2):347-364.
- 1719 14. Macknik SL & Livingstone MS (1998) Neuronal correlates of visibility and  
1720 invisibility in the primate visual system. *Nature neuroscience* 1(2):144-149.
- 1721 15. Lamme VA, Zipser K, & Spekreijse H (2002) Masking interrupts figure-  
1722 ground signals in V1. *J Cogn Neurosci* 14(7):1044-1053.
- 1723 16. Kovacs G, Vogels R, & Orban GA (1995) Cortical correlate of pattern  
1724 backward masking. *Proceedings of the National Academy of Sciences*  
1725 92(12):5587-5591.
- 1726 17. Rolls ET, Tovee MJ, & Panzeri S (1999) The neurophysiology of backward  
1727 visual masking: information analysis. *Journal of Cognitive Neuroscience*  
1728 11(3):300-311.
- 1729 18. Keyser C & Perrett DI (2002) Visual masking and RSVP reveal neural  
1730 competition. *Trends Cogn Sci* 6(3):120-125.
- 1731 19. Enns JT & Di Lollo V (2000) What's new in visual masking? *Trends Cogn Sci*  
1732 4(9):345-352.
- 1733 20. Thompson KG & Schall JD (1999) The detection of visual signals by macaque  
1734 frontal eye field during masking. *Nature neuroscience* 2(3):283-288.
- 1735 21. Kellman PJ, Guttman S, & Wickens T (2001) Geometric and neural models of  
1736 object perception. *From fragments to objects: Segmentation and grouping in*  
1737 *vision*, eds Shipley TF & Kellman PJ (Elsevier Science Publishers, Oxford, UK).
- 1738 22. Murray RF, Sekuler AB, & Bennett PJ (2001) Time course of amodal  
1739 completion revealed by a shape discrimination task. *Psychon Bull Rev*  
1740 8(4):713-720.
- 1741 23. Kosai Y, El-Shamayleh Y, Fyall AM, & Pasupathy A (2014) The role of visual  
1742 area V4 in the discrimination of partially occluded shapes. *Journal of*  
1743 *Neuroscience* 34(25):8570-8584.
- 1744 24. Nakayama K, He Z, & Shimojo S (1995) Visual surface representation: a  
1745 critical link between lower-level and higher-level vision. *Visual cognition*, eds  
1746 Kosslyn S & Osherson D (The MIT press, Cambridge), Vol 2.
- 1747 25. Tang H, *et al.* (2014) Spatiotemporal dynamics underlying object completion  
1748 in human ventral visual cortex. *Neuron* 83:736-748.
- 1749 26. Johnson JS & Olshausen BA (2005) The recognition of partially visible natural  
1750 objects in the presence and absence of their occluders. *Vision research* 45(25-  
1751 26):3262-3276.
- 1752 27. Lee TS (2003) Computations in the early visual cortex. *J Physiol Paris* 97(2-  
1753 3):121-139.
- 1754 28. Gosselin F & Schyns PG (2001) Bubbles: a technique to reveal the use of  
1755 information in recognition tasks. *Vision research* 41(17):2261-2271.
- 1756 29. Williams P (1998) Representational organization of multiple exemplars of  
1757 object categories.
- 1758 30. Willenbockel V, *et al.* (2010) Controlling low-level image properties: the  
1759 SHINE toolbox. *Behav Res Methods* 42(3):671-684.
- 1760 31. Krizhevsky A, Sutskever I, & Hinton G (2012) ImageNet Classification with  
1761 Deep Convolutional Neural Networks. in *NIPS* (Montreal).



- 1762 32. Russakovsky O, *et al.* (2014) ImageNet Large Scale Visual Recognition  
1763 Challenge. in *CVPR* (arXiv:1409.0575, 2014).
- 1764 33. Yangqing J, *et al.* (2014) Caffe: Convolutional Architecture for Fast Feature  
1765 Embedding. *arXiv*:1408.5093.
- 1766 34. Simonyan K & Zisserman A (2014) Very deep convolutional networks for  
1767 large-scale image recognition. *arXiv* 1409.1556.
- 1768 35. He K, Zhang X, Ren S, & Sun J (2015) Deep residual learning for image  
1769 recognition. *arXiv* 1512.03385.
- 1770 36. Szegedy C, Vanhoucke V, Ioffe S, Shlens J, & Wojna Z (2015) Rethinking the  
1771 inception architecture for computer vision. *arXiv* 1512.005673v3.
- 1772 37. van der Maaten L & Hinton G (2008) Visualizing High-Dimensional Data  
1773 Using t-SNE. *J. Machine Learning Res.* 9:2579-2605.
- 1774 38. Hopfield JJ (1982) Neural networks and physical systems with emergent  
1775 collective computational abilities. *PNAS* 79:2554-2558.
- 1776 39. Li J, Michel A, & Porod W (1989) Analysis and synthesis of a class of neural  
1777 networks: linear systems operating on a closed hypercube. *IEEE Transactions*  
1778 *on Circuits and Systems* 36(11):1405-1422.
- 1779 40. Bregman AL (1981) *Asking the "what for" question in auditory perception*  
1780 (Erlbaum, Hillsdale, NJ) p 19.
- 1781 41. Pepik B, Benenson R, Ritschel T, & Schiele B (2015) What is holding back  
1782 convnets for detection? 1508.
- 1783 42. Spoerer CJ, McClure P, & Kriegeskorte N (2017) Recurrent Convolutional  
1784 Neural Networks: A Better Model of Biological Object Recognition. *Frontiers*  
1785 *in psychology* 8:1551.
- 1786 43. DiCarlo JJ & Cox DD (2007) Untangling invariant object recognition. *Trends*  
1787 *Cogn Sci* 11(8):333-341.
- 1788 44. Lamme VA & Roelfsema PR (2000) The distinct modes of vision offered by  
1789 feedforward and recurrent processing. *Trends Neurosci* 23(11):571-579.
- 1790 45. Gilbert CD & Li W (2013) Top-down influences on visual processing. *Nat Rev*  
1791 *Neurosci* 14(5):350-363.
- 1792 46. Panzeri S, Rolls ET, Battaglia F, & Lavis R (2001) Speed of feedforward and  
1793 recurrent processing in multilayer networks of integrate-and-fire neurons.  
1794 *Network* 12(4):423-440.
- 1795 47. Koch C (1999) *Biophysics of Computation* (Oxford University Press, New  
1796 York).
- 1797 48. Fyall AM, El-Shamayleh Y, Choi H, Shea-Brown E, & Pasupathy A (2017)  
1798 Dynamic representation of partially occluded objects in primate prefrontal  
1799 and visual cortex. *eLife* 6.
- 1800

# Supplementary Figure 1

**A**

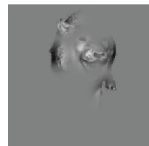

Partial

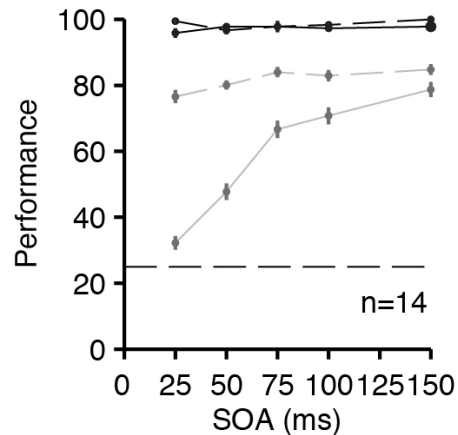

**B**

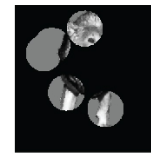

Occluded

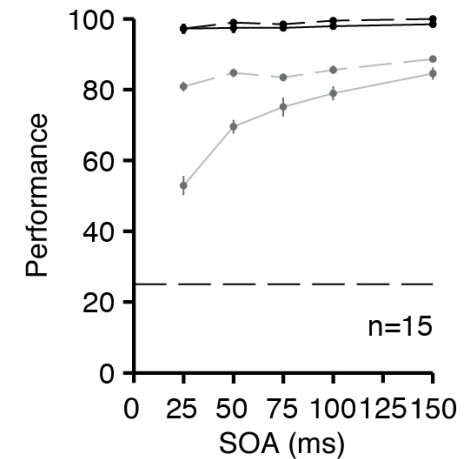

## Figure S1: Robust performance with occluded stimuli

We measured categorization performance with masking (solid lines) or without masking (dashed lines) for **(A)** partial and **(B)** occluded stimuli on a set of 16 exemplars belonging to 4 categories (chance = 25%, dashed lines). There was no overlap between the 14 subjects that participated in **(A)** and the 15 subjects that participated in **(B)**. The effect of backward masking was consistent across both types of stimuli. The black lines indicate whole objects and the gray lines indicate the partial and occluded objects. Error bars denote SEM.

# Supplementary Figure 2

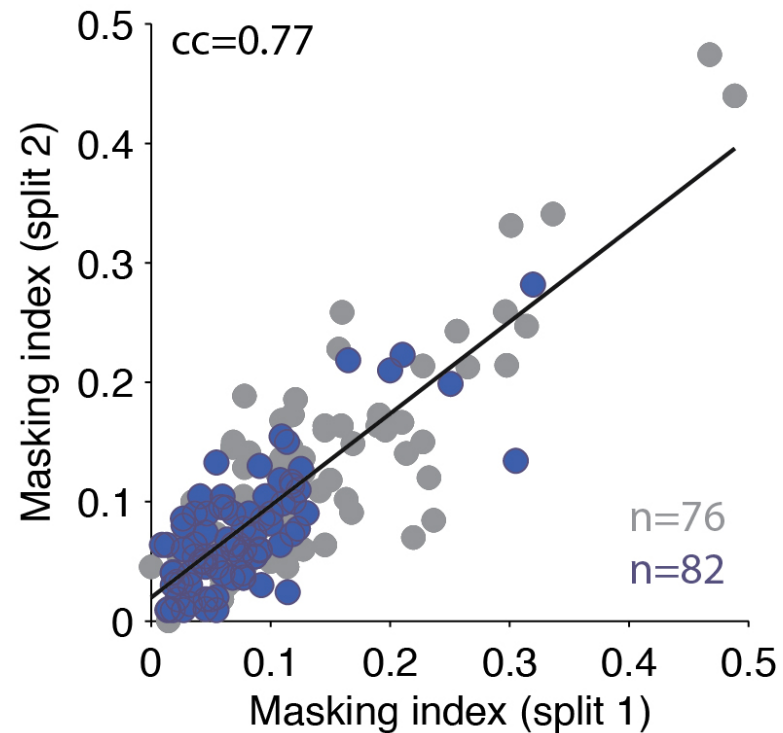

## Figure S2: Example half-split reliability of psychophysics data

**Figure 2E** in the main text reports the masking index, a measure of how much recognition of each individual image is affected by backward masking. This measure is computed by averaging performance across subjects. In order to evaluate the variability in this metric, we randomly split the data into two halves and computed the masking index for each image for each half of the data. This figure shows one such split and how well one split correlates with the other split. **Figure 2F** shows error bars defined by computing standard deviations of the masking indices from 100 such random splits.

# Supplementary Figure 3

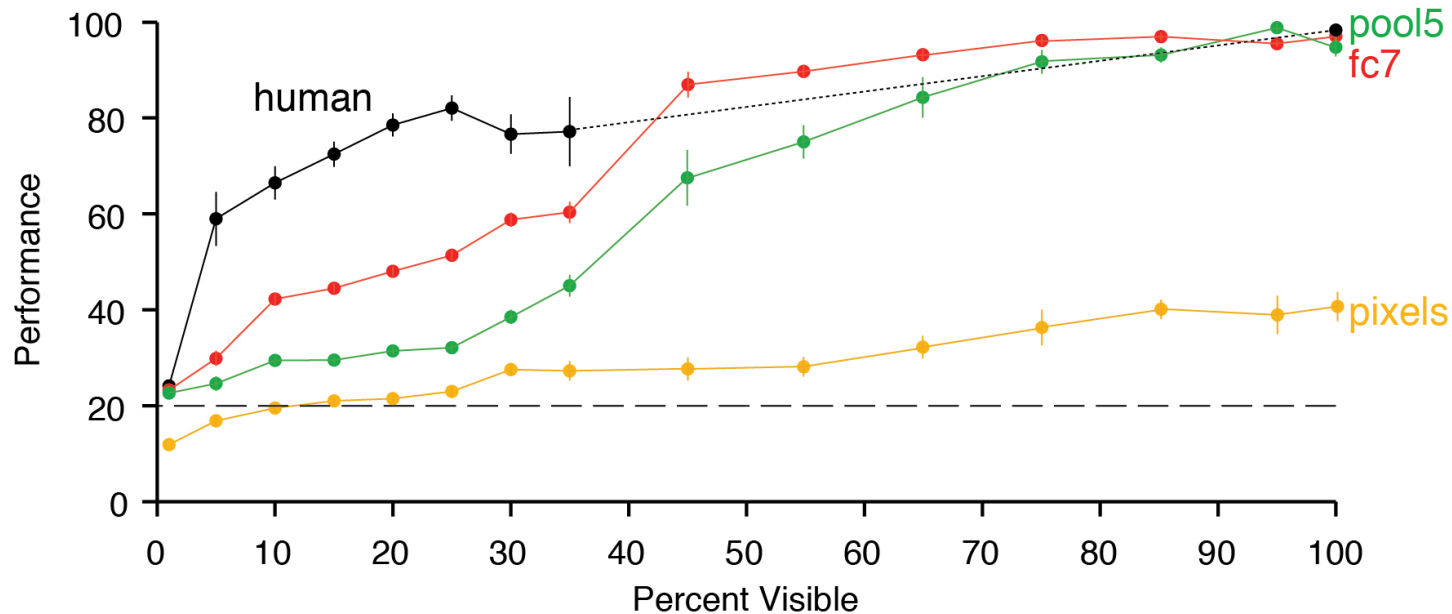

## Figure S3: Bottom-up models can recognize minimally occluded images

Extension to **Fig. 3A** showing that bottom-up models successfully recognize objects when more information is available (**Fig. 3A** showed visibility values up to 35% whereas this figure extends visibility up to 100%). The format and conventions are the same as those in **Fig. 3A**. The black dotted line shows interpolated human performance between the psychophysics experimental values measured at 35% and 100% visibility levels.

# Supplementary Figure 4

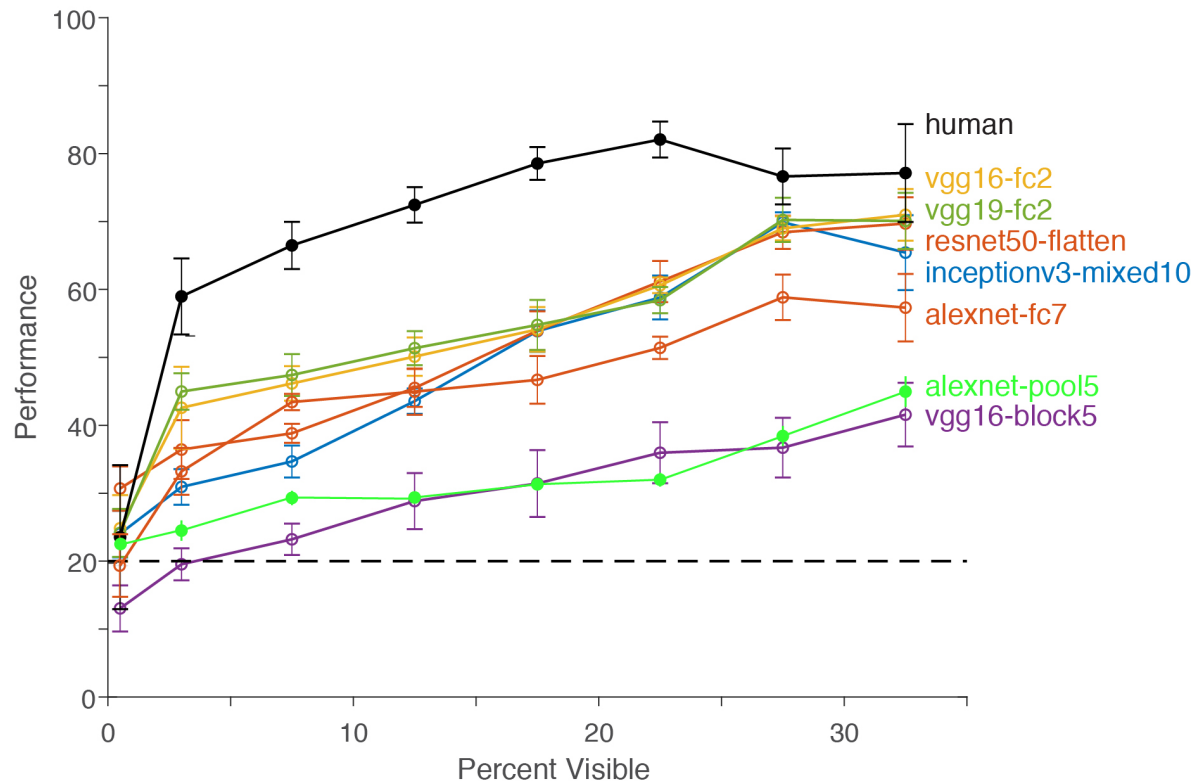

## Figure S4: All of the purely feed-forward models tested were impaired under low visibility conditions

The human, AlexNet-pool5 and AlexNet-fc curves are the same ones shown in **Figure 3A** and are reproduced here for comparison purposes. This figure shows performance for several other models: VGG16-fc2, VGG19-fc2, ResNet50-flatten, inceptionV3-mixed10, VGG16-block5 (see text for references). In all cases, these models were pre-trained to optimize performance under ImageNet 2012 and there was no additional training (see also **Figure S5** for fine tuning results). An expanded version of this figure with many other layers and models can be found on our web site:

[http://klab.tch.harvard.edu/resources/Tangetal\\_RecurrentComputations.html](http://klab.tch.harvard.edu/resources/Tangetal_RecurrentComputations.html)

# Supplementary Figure 5

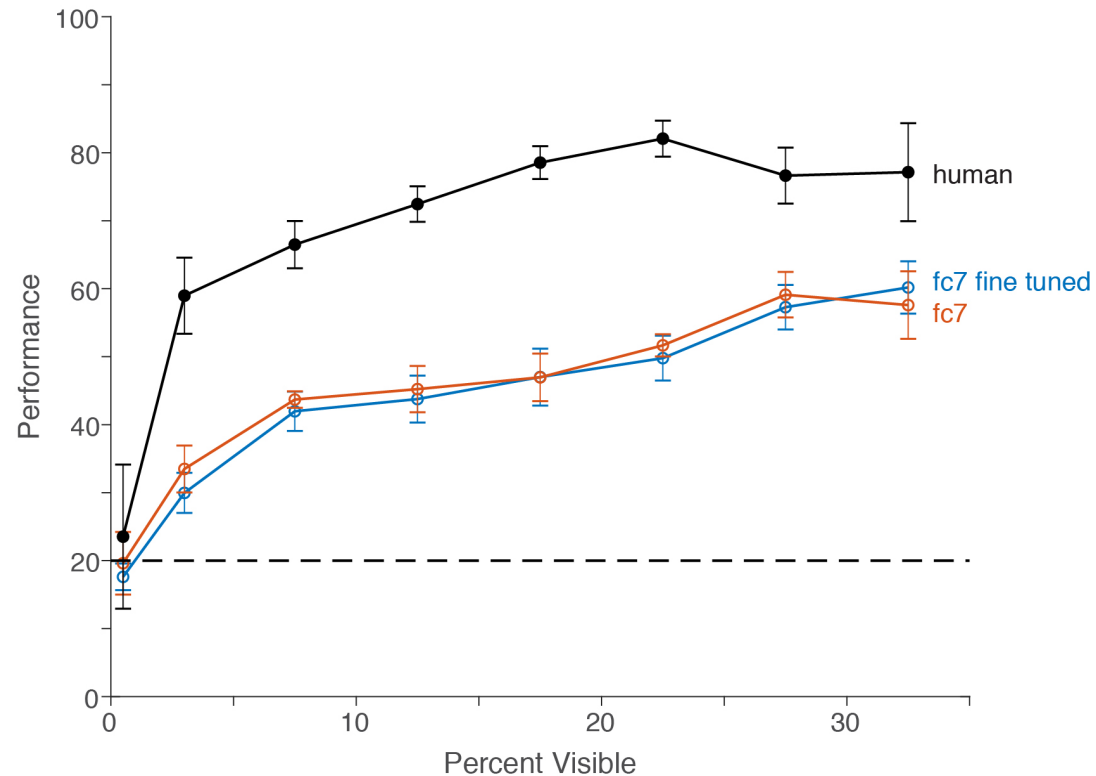

**Figure S5: Fine-tuning did not improve performance under heavy occlusion**

The human and fc7 curves are the same ones shown in **Figure 3A** and are reproduced here for comparison purposes. The pre-trained AlexNet network used in the text was fine tuned using back-propagation with the set of *whole* images from the psychophysics experiment (in contrast with the pre-trained Alexnet network which was trained using the Imagenet 2012 data set). The fine-tuning involved all layers (**Methods**).

# Supplementary Figure 6

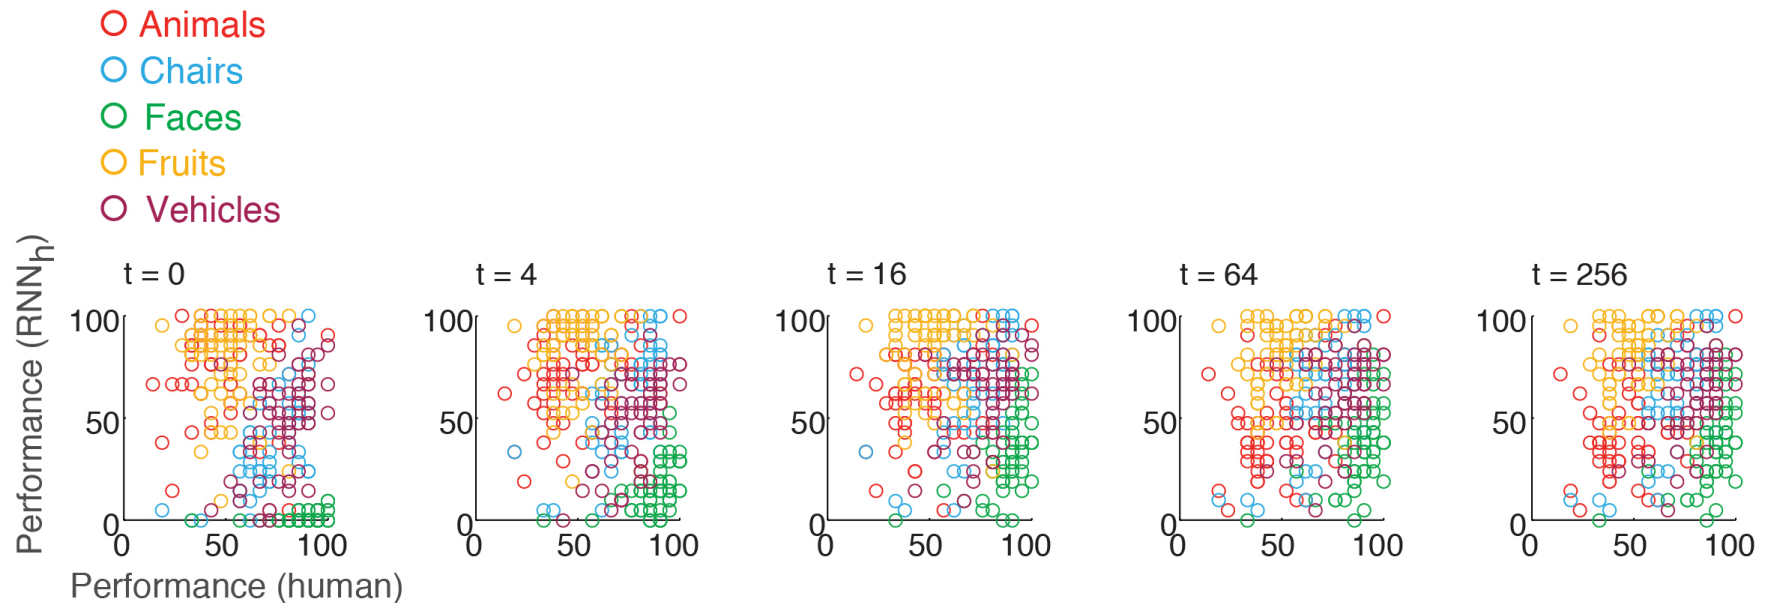

**Figure S6: Correlation between RNN<sub>h</sub> model and human performance for individual objects as a function of time**

At each time step in the recurrent neural network model (RNN<sub>h</sub>), the scatter plots show the relationship between the model's performance on individual partial exemplar objects and human performance. Each dot is an individual exemplar object. In **Fig. 4E** we report the average correlation coefficient across all categories.

# Supplementary Figure 7

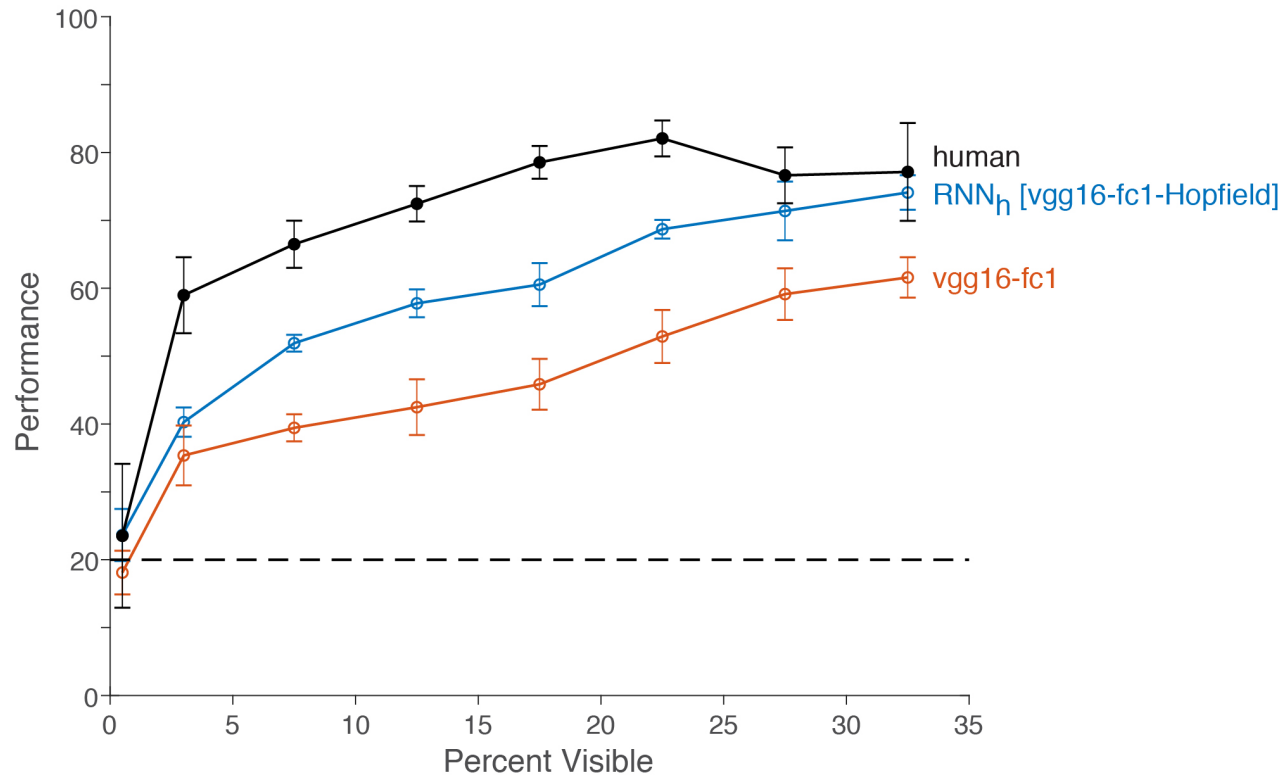

**Figure S7: Adding recurrent connectivity to VGG16 also improved performance**

This Figure parallels the results shown in **Figure 4B** for AlexNet, here using the VGG16 network, implemented in keras (**Methods**). The results shown here are based on using 4096 units from the fc1 layer. The red curve (vgg16-fc1) corresponds to the original model without any recurrent connections. The implementation of the RNN<sub>h</sub> model here (VGG16-fc1-Hopfield) is similar to the one in **Figure 4B**, except that here we use the VGG16 fc1 activations instead of the AlexNet fc7 activations. An expanded version of this figure with similar results for several other layers and models can be found on our web site: [http://klab.tch.harvard.edu/resources/Tangetal\\_RecurrentComputations.html](http://klab.tch.harvard.edu/resources/Tangetal_RecurrentComputations.html)



# Supplementary Figure 8

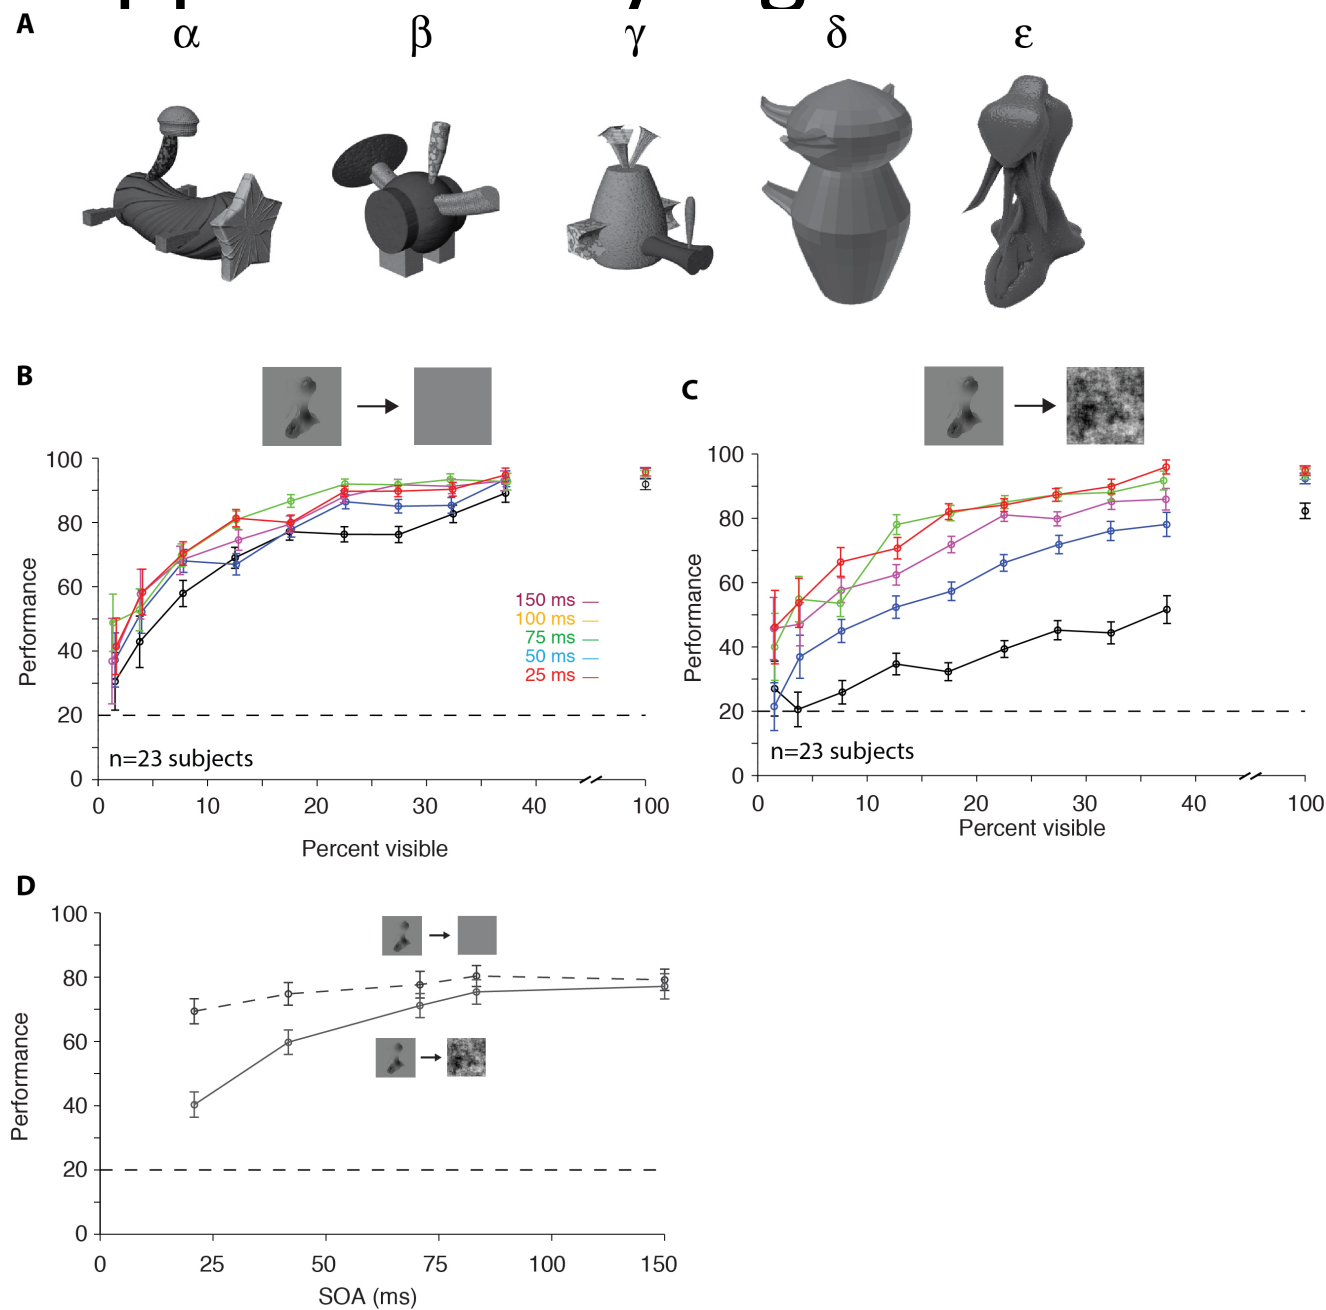

**Figure S8: Robust recognition of novel objects under low visibility conditions**

**A.** Single exemplar from each of the 5 novel object categories (**Methods**). **(B-C)** Behavioral performance for the unmasked (**B**) and masked (**C**) trials. The experiment was identical to the one in **Figure 1** and the format of this figure follows that in **Figure 1F-G**. The colors denote different SOAs. Error bars=SEM. Dashed line = chance level (20%). Bin size=2.5%. Note the discontinuity in the x-axis to report performance for whole objects (100% visibility). **(D)** Average recognition performance as a function of the stimulus onset asynchrony (SOA) for partial objects (same data and conventions as **B-C**, excluding 100% visibility). Error bars=SEM. Performance was significantly degraded by masking (solid) compared to the unmasked trials (dotted) ( $p < 0.0001$ , Chi-squared test,  $d.f. = 4$ ).

# Supplementary Figure 9

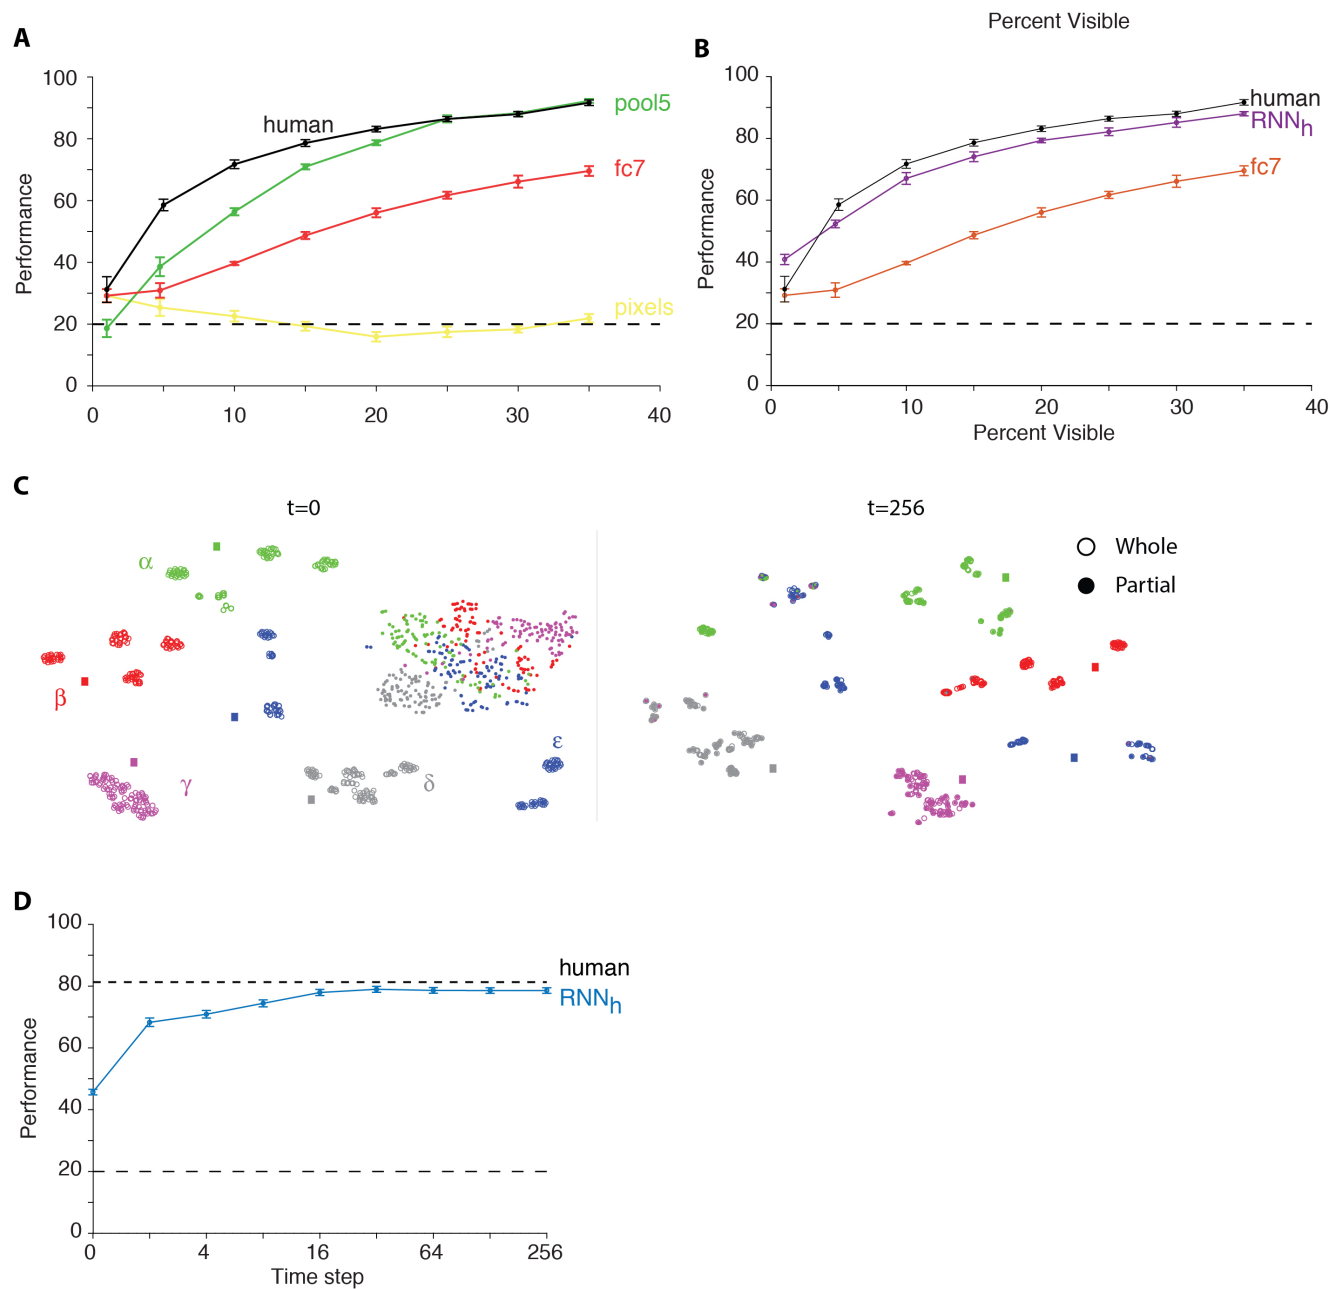

**Figure S9: The performance of feed-forward and recurrent computational models for novel objects was similar to those for known object categories**

**A.** Performance of feed-forward computational models (format as in **Figure 3A**) for novel objects.

**B.** Performance of the recurrent neural network RNN<sub>h</sub> (format as in **Figure 4B**) for novel objects.

**C.** Temporal evolution of the feature representation for RNN<sub>h</sub> (format as in **Figure 4C**). The colors and greek letters denote the five object categories (see examples in **Figure S8A**).

**D.** Performance of RNN<sub>h</sub> as a function of recurrent time for novel objects (format as in **Figure 4D**).

# Supplementary Figure 10

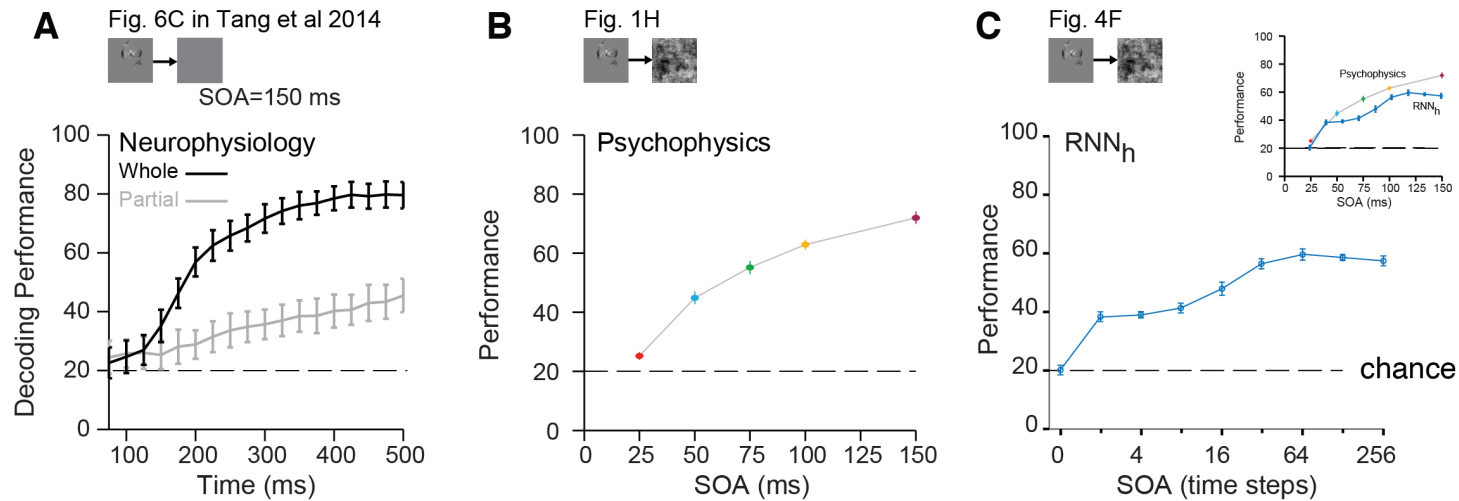

## Figure S10: Side-by-side comparison of neurophysiological signals, psychophysics and computational model

**A.** Reproduction of Figure 6C from Tang et al 2014. This figure shows the dynamics of decoding object information for whole objects and (black) and partial objects (gray) from neurophysiological recordings as a function of time post stimulus onset (see Tang et al 2014 for details).

**B.** Reproduction of **Figure 1H** (behavior).

**C.** Reproduction of **Figure 4F** (RNN<sub>h</sub> model).

Above each subplot, the experiment schematic highlights that **A** involves no masking and fixed SOA = 150 ms whereas **B**, **C** involve masking and variable SOAs. The inset in part **C** directly overlays the results of the RNN<sub>h</sub> model in **C** onto the results of the psychophysics experiment in **B**. In order to create this plot, we mapped 0 time steps to 25ms, 256 time steps to 150 ms and linearly interpolated the time steps in between.

# Supplementary Figure 11

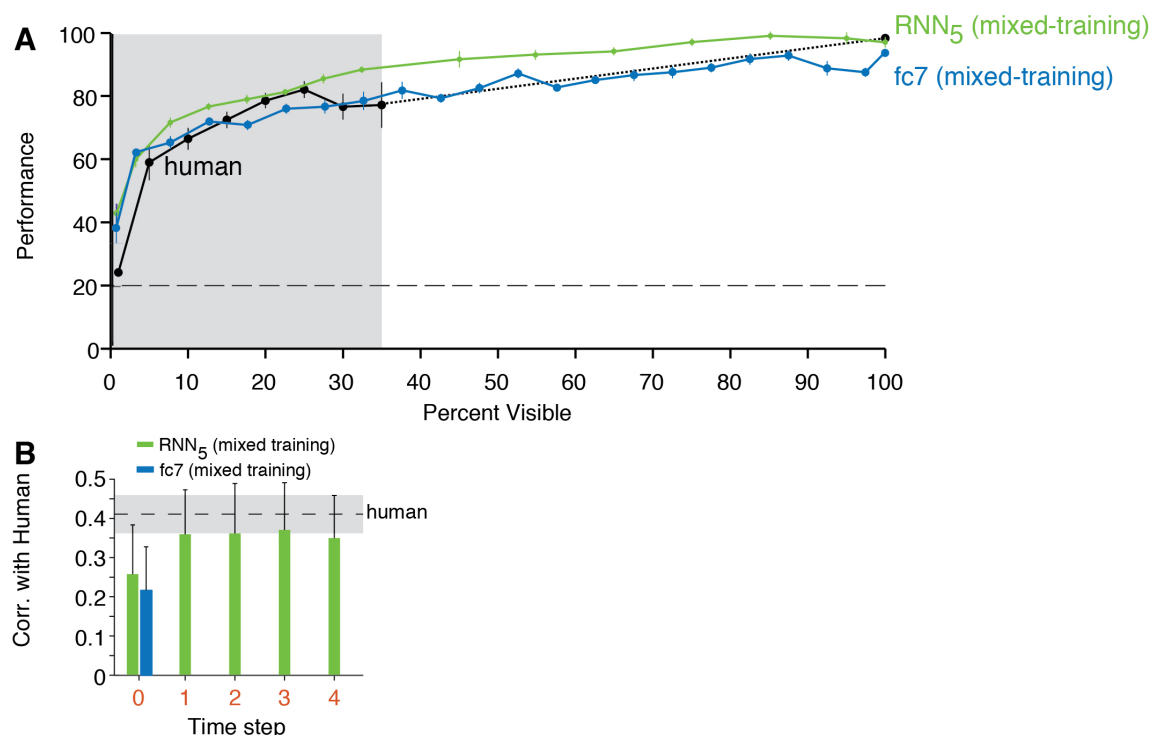

## Figure S11: Mixed training regimes.

A. This figure follows the format of **Fig3A, 4B** and **S3A, S4, S5, S7, S9A-B**. The black line shows human performance and is copied from **Fig. 3A** for comparison purposes. The green and blue lines show the recurrent model (RNN<sub>5</sub>) and bottom-up model (AlexNet fc7), respectively, trained in a mixed regime that included the occluded objects with visibility levels within the gray rectangle (the same ones used to evaluate human psychophysics performance). In the RNN<sub>5</sub> model, there were ~16 million weights trained (all-to-all in the fc7 layer) whereas in the Alexnet fc7 model, there were ~60 million weights trained (all the weights across layers in the Alexnet model). Cross-validated test performance is shown here as well as in the other figures throughout the manuscript. As noted in the text, we emphasize that this figure involves a different training regime from the ones in the previous figures (here the models are trained with occluded objects) and, therefore, one cannot directly compare performance in this figure with the previous figures.

B. This figure follows the format of **Fig. 4E**. The green and blue bars show the correlation between human and model for the recurrent model and bottom-up model, respectively, both trained using occluded objects. The gray rectangle shows human-human correlation, see **Fig. 4E** for details..

# Supplementary Figure 12

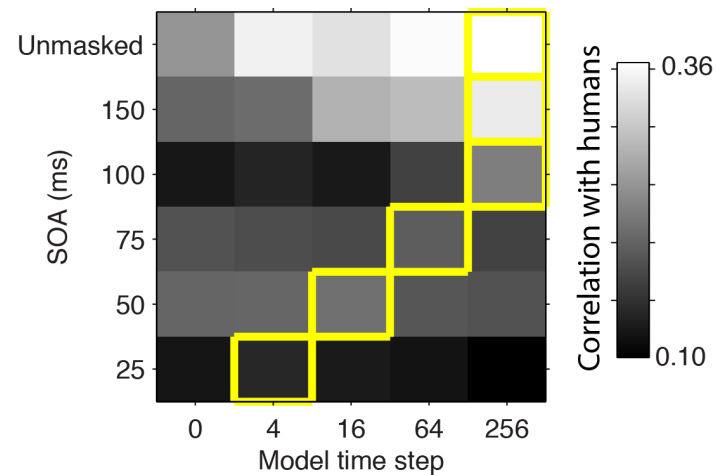

**Figure S12: Image-by-image comparison between RNNh model performance and human performance in the masked condition**

Expanding on **Figure 4E**, this figure shows the correlation coefficient between human recognition performance in the masked condition (**Figure 1B**) at a given SOA (y-axis) and RNNh model performance at a given time step (x-axis). The top row shows the unmasked condition (**Figure 1A**). In this figure, there is no mask for the model (see **Figure 4F** for model performance with a mask). The computation of the correlation coefficient follows the same procedure illustrated in **Figure S6** and **4E**. The color scale for the correlation coefficient is shown on the right. As an upper bound and as shown in **Figure 4E**, the correlation coefficient between different human subjects was 0.41 for the unmasked condition. The yellow boxes highlight the highest correlation for a given SOA value.
